# Supplementary material for: Introduction of a SiFA Moiety into the D-Glutamate Chain of DOTA-PP-F11N Results in Radiohybrid-Based CCK-2R-Targeted Compounds with Improved Pharmacokinetics In Vivo
Source: MDPI journal article supplement (doi:10.3390/ph15121467), 2022-11-25
Supplement: s1 [file s1]

**Introduction of a SiFA Moiety into the D-Glutamate Chain of DOTA-  
PP-F11N Results in Radiohybrid-Based CCK-2R-Targeted Compounds  
with Improved Pharmacokinetics *in vivo***

**- Supplementary Materials -**

**Nadine Holzleitner<sup>1,\*,</sup> Thomas Günther<sup>1,#</sup>, Roswitha Beck<sup>1</sup>, Constantin Lapa<sup>2</sup> and Hans-Jürgen Wester<sup>1</sup>**

<sup>1</sup>Chair of Pharmaceutical Radiochemistry, Department of Chemistry, Technical University of Munich, Garching, Germany

<sup>2</sup>Clinic for Nuclear Medicine, University Hospital Augsburg, Augsburg, Germany

**Corresponding co-authors:**

Nadine Holzleitner and Thomas Günther

Phone: +49.89.289.12203

Technical University of Munich,

Chair of Pharmaceutical Radiochemistry,

Walther-Meissner-Str. 3

85748 Garching

GERMANY

Fax: +49.89.289.12204

E-Mail: nadine.holzleitner@tum.de and thomas.guenther@tum.de

ORCID: <https://orcid.org/0000-0001-8258-3526> (NH) and <https://orcid.org/0000-0002-7412-0297> (TG)

## Analytical data of $^{nat/177}\text{Lu}$ -labeled minigastrin analogues

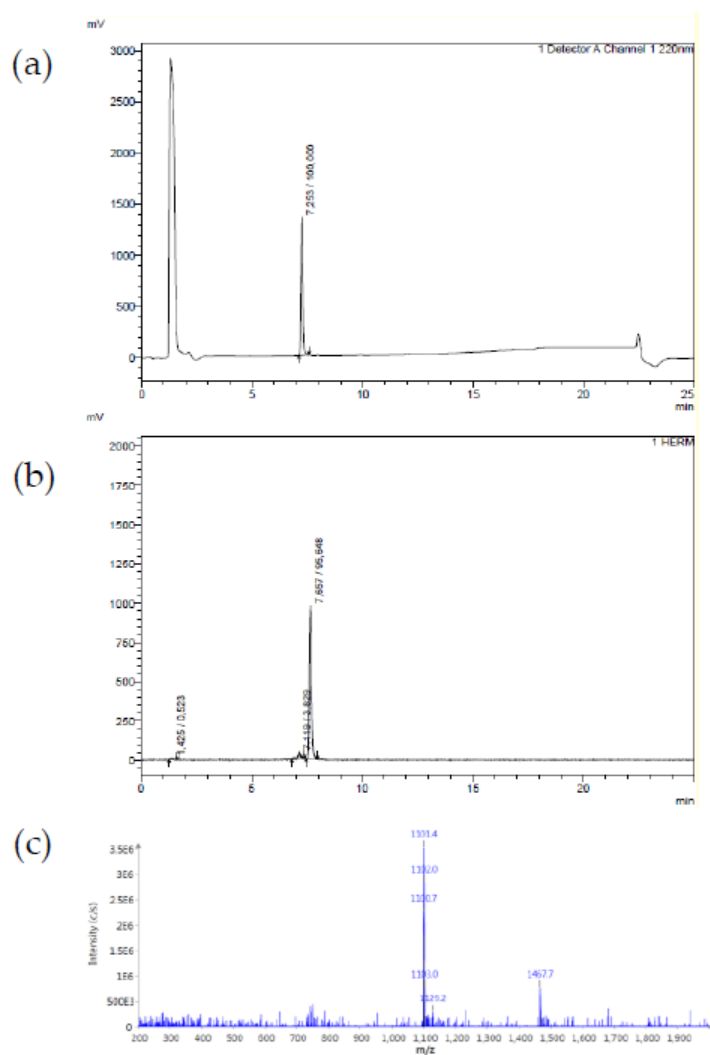

**Figure S1.** Confirmation of peptide identity and integrity for (a)  $^{nat}\text{Lu}$ ]-Lu-DOTA-PP-F11N and (b)  $^{177}\text{Lu}$ ]-Lu-DOTA-PP-F11N as analysed by analytical (radio-)RP-HPLC (MultoKrom 100-5 C18, 5  $\mu\text{m}$ , 125  $\times$  4.6 mm, CS Chromatographie GmbH, Langerwehe, Germany; 10 $\rightarrow$ 90% MeCN in  $\text{H}_2\text{O}$  + 0.1% TFA in 15 min). (c) Mass spectrum of  $^{nat}\text{Lu}$ ]-Lu-DOTA-PP-F11N.

[<sup>nat</sup>Lu]Lu-DOTA-PP-F11N: RP-HPLC (10→90% MeCN in H<sub>2</sub>O with 0.1% TFA, 15 min, λ = 220 nm): t<sub>R</sub> = 7.55 min, K' = 3.48; MS (ESI, positive): m/z calculated for C<sub>90</sub>H<sub>120</sub>LuN<sub>19</sub>O<sub>35</sub>: 2203.0, found: m/z = 1101.4 [M+2H]<sup>2+</sup>.

[<sup>nat</sup>Lu]Lu-DOTA-PP-γ-F11N: RP-HPLC (10→90% MeCN in H<sub>2</sub>O with 0.1% TFA, 15 min, λ = 220 nm): t<sub>R</sub> = 7.41 min, K' = 3.39; MS (ESI, positive): m/z calculated for C<sub>90</sub>H<sub>120</sub>LuN<sub>19</sub>O<sub>35</sub>: 2203.0, found: m/z = 1101.9 [M+2H]<sup>2+</sup>.

**[<sup>nat</sup>Lu]Lu-CP04:** RP-HPLC (10→90% MeCN in H<sub>2</sub>O with 0.1% TFA, 15 min, λ = 220 nm): t<sub>R</sub> = 7.60 min, K' = 3.51; MS (ESI, positive): m/z calculated for C<sub>89</sub>H<sub>118</sub>LuN<sub>19</sub>O<sub>35</sub>S: 2219.7, found: m/z = 1110.3 [M+2H]<sup>2+</sup>.

[<sup>nat</sup>Lu]Lu-γ-CP04: RP-HPLC (10→90% MeCN in H<sub>2</sub>O with 0.1% TFA, 15 min, λ = 220 nm): t<sub>R</sub> = 7.40 min, K' = 3.39; MS (ESI, positive): m/z calculated for C<sub>89</sub>H<sub>118</sub>LuN<sub>19</sub>O<sub>35</sub>S: 2219.7, found: m/z = 1110.8 [M+2H]<sup>2+</sup>.

**[<sup>nat</sup>Lu]Lu-(R)-DOTAGA-rhCCK-1:** RP-HPLC (10→90% MeCN in H<sub>2</sub>O with 0.1% TFA, 15 min, λ = 220 nm): t<sub>R</sub> = 10.1 min, K' = 4.99; MS (ESI, positive): m/z calculated for C<sub>111</sub>H<sub>151</sub>FLuN<sub>21</sub>O<sub>39</sub>Si: 2625.6, found: m/z = 1312.8 [M+2H]<sup>2+</sup>.

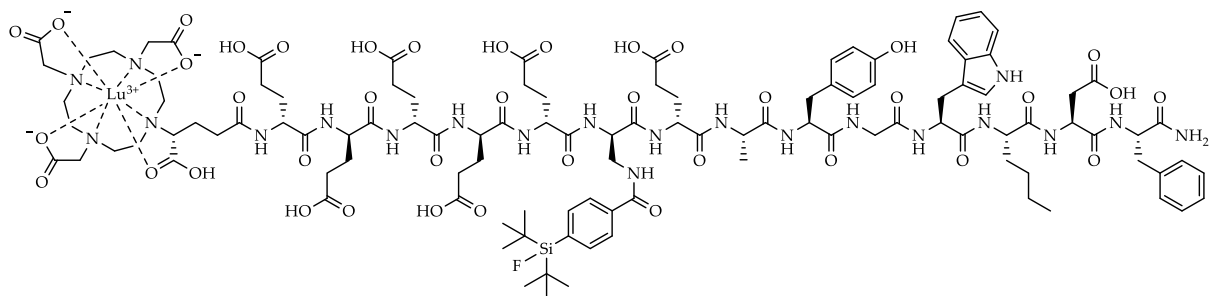

**[<sup>nat</sup>Lu]Lu-(R)-DOTAGA-rhCCK-2:** RP-HPLC (10→90% MeCN in H<sub>2</sub>O with 0.1% TFA, 15 min,  $\lambda$  = 220 nm):  $t_R$  = 9.84 min,  $K'$  = 4.83; MS (ESI, positive):  $m/z$  calculated for C<sub>111</sub>H<sub>151</sub>FLuN<sub>21</sub>O<sub>39</sub>Si: 2625.6, found:  $m/z$  = 1312.7 [M+2H]<sup>2+</sup>.

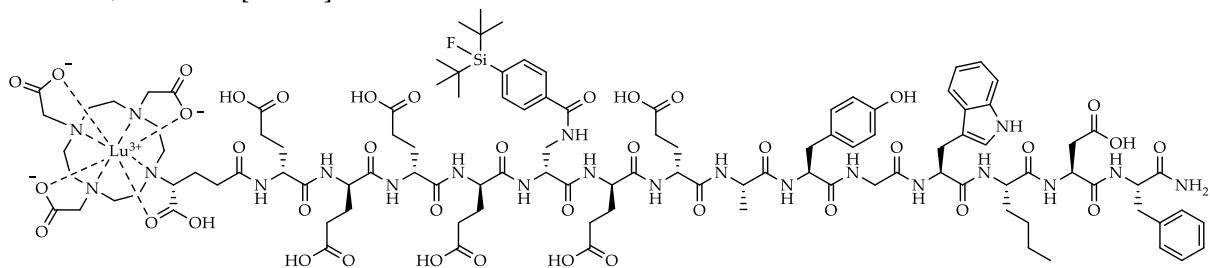

**[<sup>nat</sup>Lu]Lu-(R)-DOTAGA-rhCCK-3:** RP-HPLC (10→90% MeCN in H<sub>2</sub>O with 0.1% TFA, 15 min,  $\lambda$  = 220 nm):  $t_R$  = 9.85 min,  $K'$  = 4.84; MS (ESI, positive):  $m/z$  calculated for C<sub>111</sub>H<sub>151</sub>FLuN<sub>21</sub>O<sub>39</sub>Si: 2625.6, found:  $m/z$  = 1312.3 [M+2H]<sup>2+</sup>.

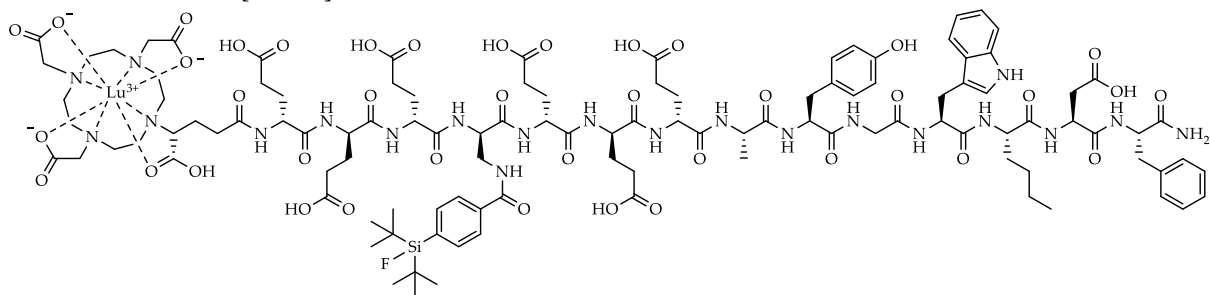

**[<sup>nat</sup>Lu]Lu-(R)-DOTAGA-rhCCK-4:** RP-HPLC (10→70% MeCN in H<sub>2</sub>O with 0.1% TFA, 15 min,  $\lambda$  = 220 nm):  $t_R$  = 11.9 min,  $K'$  = 6.05; MS (ESI, positive):  $m/z$  calculated for C<sub>111</sub>H<sub>151</sub>FLuN<sub>21</sub>O<sub>39</sub>Si: 2625.6, found:  $m/z$  = 1313.0 [M+2H]<sup>2+</sup>.

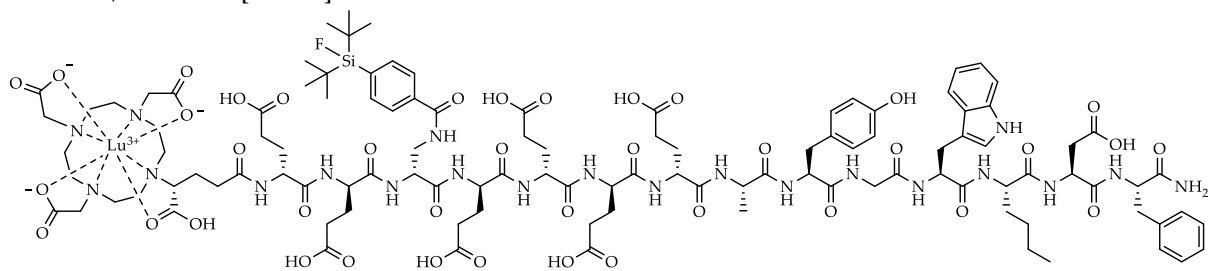

**[<sup>nat</sup>Lu]Lu-(R)-DOTAGA-rhCCK-5:** RP-HPLC (10→90% MeCN in H<sub>2</sub>O with 0.1% TFA, 15 min,  $\lambda$  = 220 nm):  $t_R$  = 9.67 min,  $K'$  = 4.73; MS (ESI, positive):  $m/z$  calculated for C<sub>111</sub>H<sub>151</sub>FLuN<sub>21</sub>O<sub>39</sub>Si: 2625.6, found:  $m/z$  = 1313.3 [M+2H]<sup>2+</sup>.

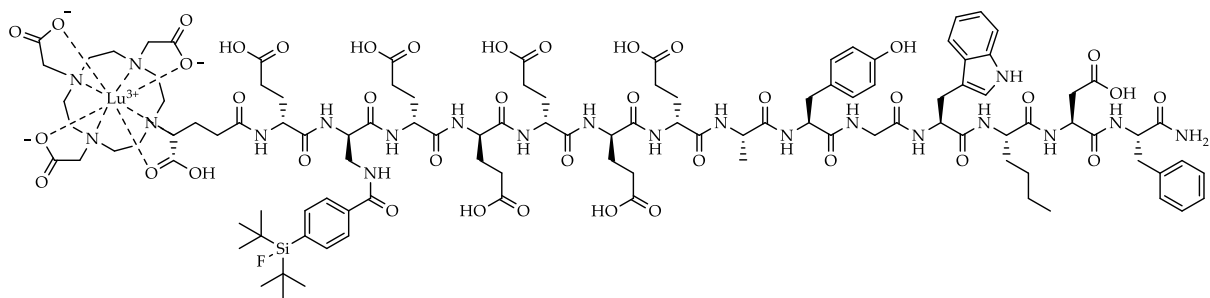

**[<sup>nat</sup>Lu]Lu-(R)-DOTAGA-rhCCK-6:** RP-HPLC (10→90% MeCN in H<sub>2</sub>O with 0.1% TFA, 15 min, λ = 220 nm): *t<sub>R</sub>* = 9.71 min, *K'* = 4.76; MS (ESI, positive): *m/z* calculated for C<sub>111</sub>H<sub>151</sub>FLuN<sub>21</sub>O<sub>39</sub>Si: 2625.6, found: *m/z* = 1312.9 [M+2H]<sup>2+</sup>.

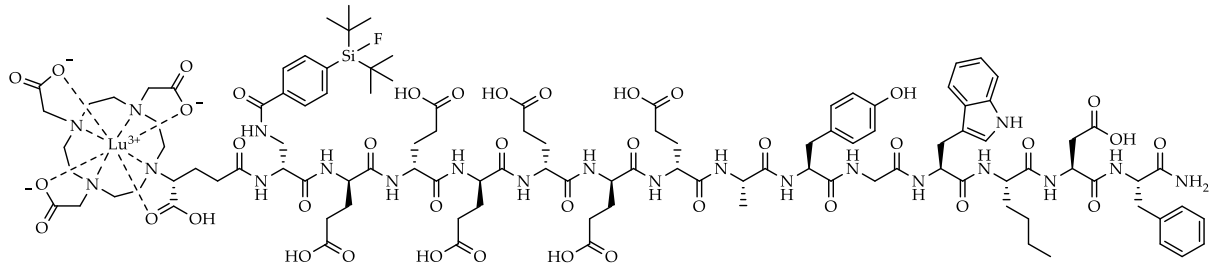

**[<sup>nat</sup>Lu]Lu-(R)-DOTAGA-rhCCK-7:** RP-HPLC (10→90% MeCN in H<sub>2</sub>O with 0.1% TFA, 15 min, λ = 220 nm): *t<sub>R</sub>* = 9.62 min, *K'* = 4.70; MS (ESI, positive): *m/z* calculated for C<sub>111</sub>H<sub>151</sub>FLuN<sub>21</sub>O<sub>39</sub>Si: 2625.6, found: *m/z* = 1313.0 [M+2H]<sup>2+</sup>.

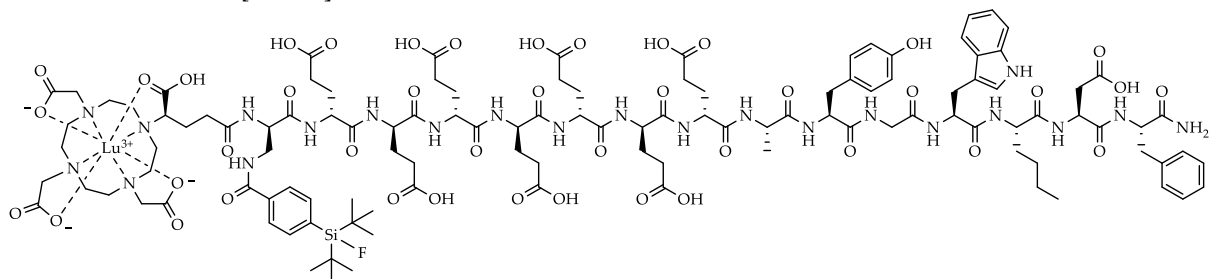

**[<sup>nat</sup>Lu]Lu-(R)-DOTAGA-rhCCK-8:** RP-HPLC (10→90% MeCN in H<sub>2</sub>O with 0.1% TFA, 15 min, λ = 220 nm): *t<sub>R</sub>* = 9.77 min, *K'* = 4.79; MS (ESI, positive): *m/z* calculated for C<sub>116</sub>H<sub>158</sub>FLuN<sub>22</sub>O<sub>42</sub>Si: 2754.7, found: *m/z* = 1378.2 [M+2H]<sup>2+</sup>.

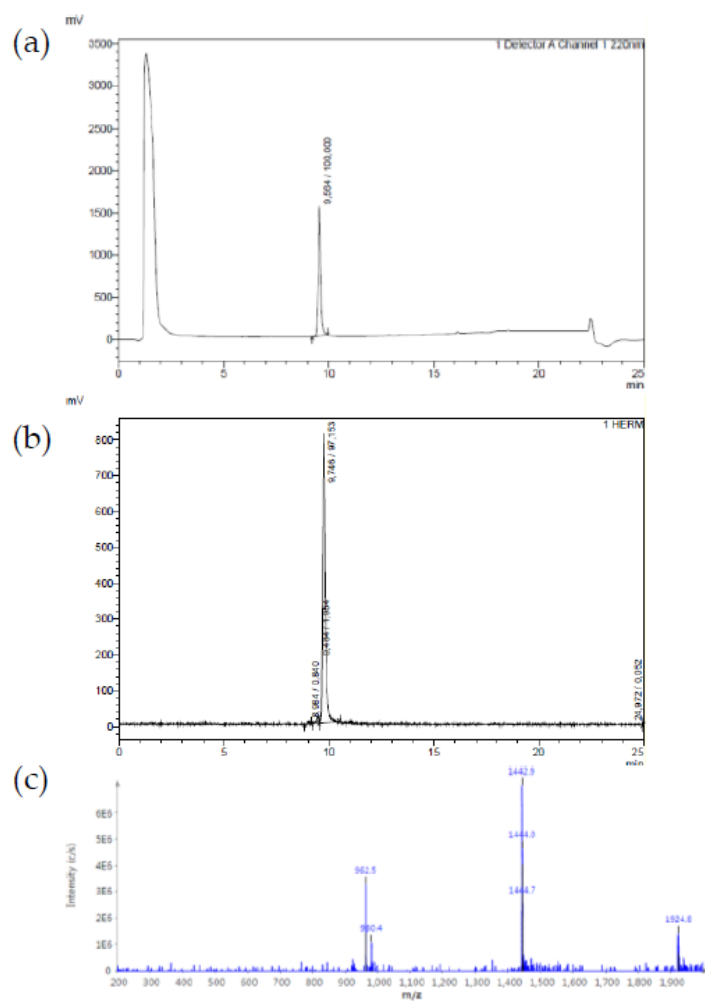

**Figure S2.** Confirmation of peptide identity and integrity for (a)  $[\text{natLu}]$ Lu-(R)-DOTAGA-rhCCK-9 and (b)  $[^{177}\text{Lu}]$ Lu-(R)-DOTAGA-rhCCK-9 as analysed by analytical (radio-)RP-HPLC (MultoKrom 100-5 C18, 5  $\mu\text{m}$ , 125  $\times$  4.6 mm, CS Chromatographie GmbH, Langerwehe, Germany; 10 $\rightarrow$ 90% MeCN in  $\text{H}_2\text{O}$  + 0.1% TFA in 15 min). (c) Mass spectrum of  $[\text{natLu}]$ Lu-(R)-DOTAGA-rhCCK-9.

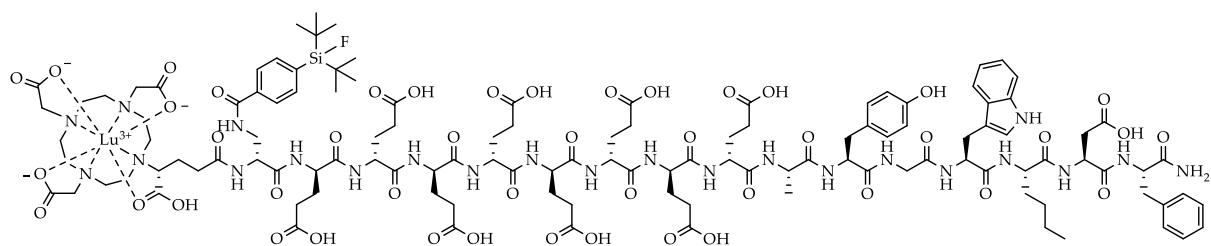

**[<sup>nat</sup>Lu]Lu-(R)-DOTAGA-rhCCK-9:** RP-HPLC (10→90% MeCN in H<sub>2</sub>O with 0.1% TFA, 15 min,  $\lambda$  = 220 nm):  $t_R$  = 9.56 min,  $K'$  = 4.67; MS (ESI, positive):  $m/z$  calculated for C<sub>121</sub>H<sub>165</sub>FLuN<sub>23</sub>O<sub>45</sub>Si: 2883.8, found:  $m/z$  = 1441.5 [M+2H]<sup>2+</sup>.

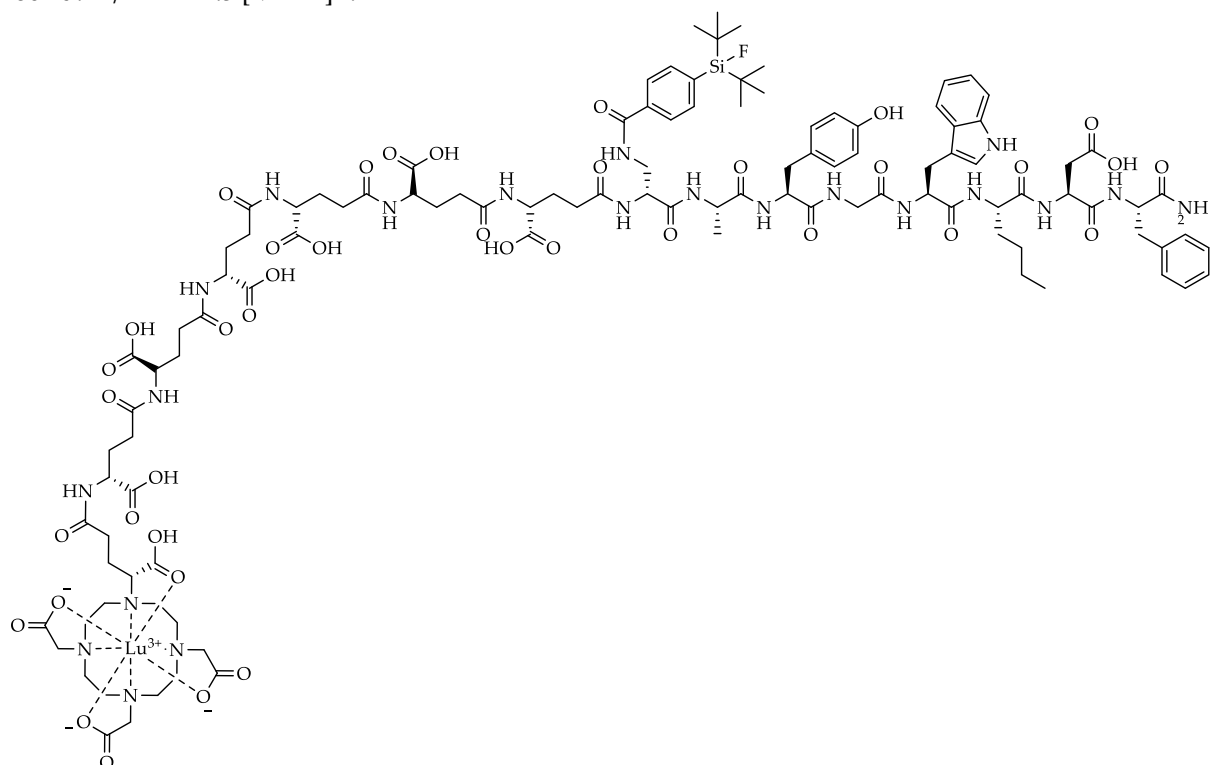

**[<sup>nat</sup>Lu]Lu-(R)-DOTAGA-rhCCK-10:** RP-HPLC (10→90% MeCN in H<sub>2</sub>O with 0.1% TFA, 15 min,  $\lambda$  = 220 nm):  $t_R$  = 10.2 min,  $K'$  = 5.05; MS (ESI, positive):  $m/z$  calculated for C<sub>111</sub>H<sub>151</sub>FLuN<sub>21</sub>O<sub>39</sub>Si: 2625.6, found:  $m/z$  = 1313.6 [M+2H]<sup>2+</sup>.

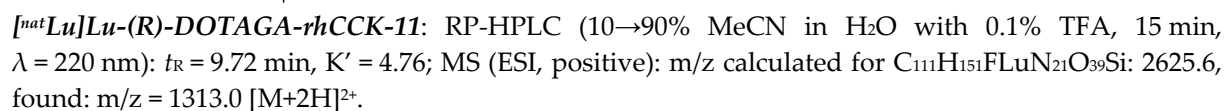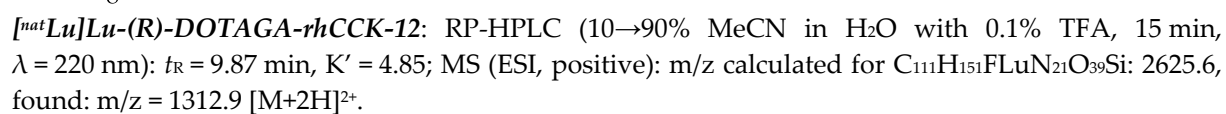



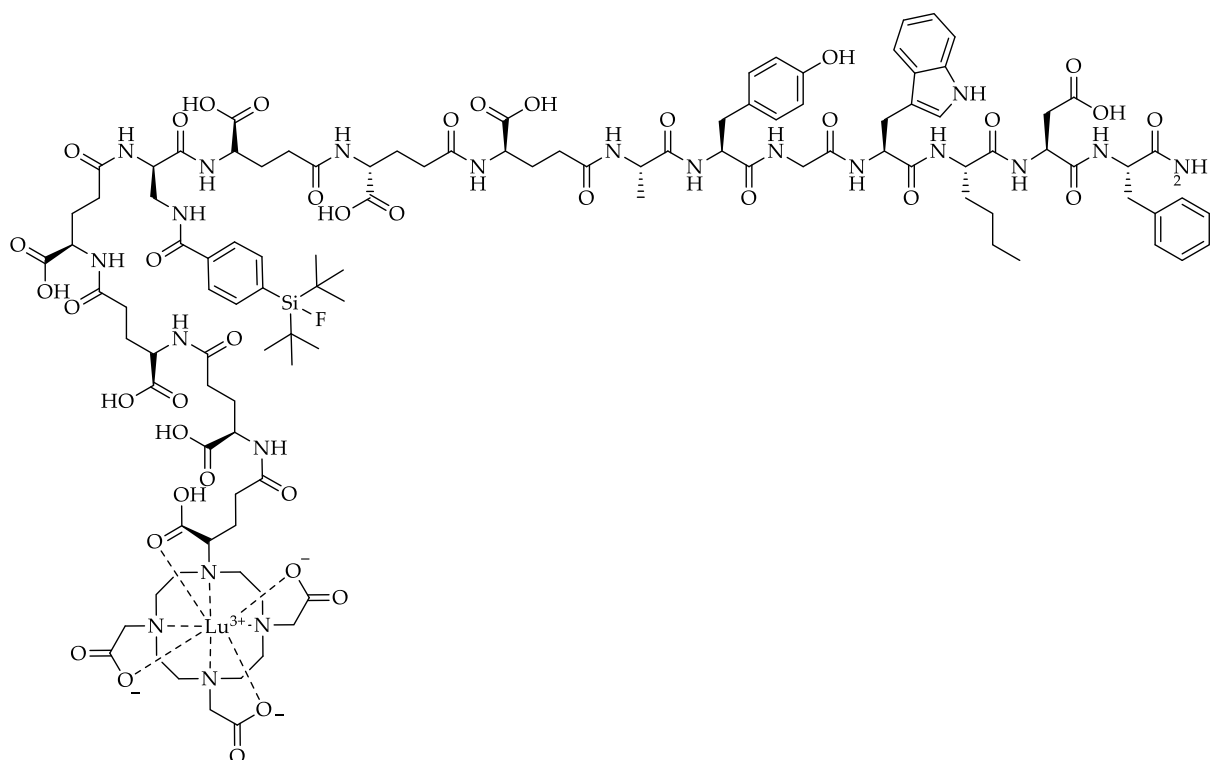

**[<sup>nat</sup>Lu]Lu-(R)-DOTAGA-rhCCK-13:** RP-HPLC (10→90% MeCN in H<sub>2</sub>O with 0.1% TFA, 15 min,  $\lambda$  = 220 nm);  $t_R$  = 9.61 min,  $K'$  = 4.70; MS (ESI, positive):  $m/z$  calculated for C<sub>111</sub>H<sub>151</sub>FLuN<sub>21</sub>O<sub>39</sub>Si: 2625.6, found:  $m/z$  = 1313.2 [M+2H]<sup>2+</sup>.

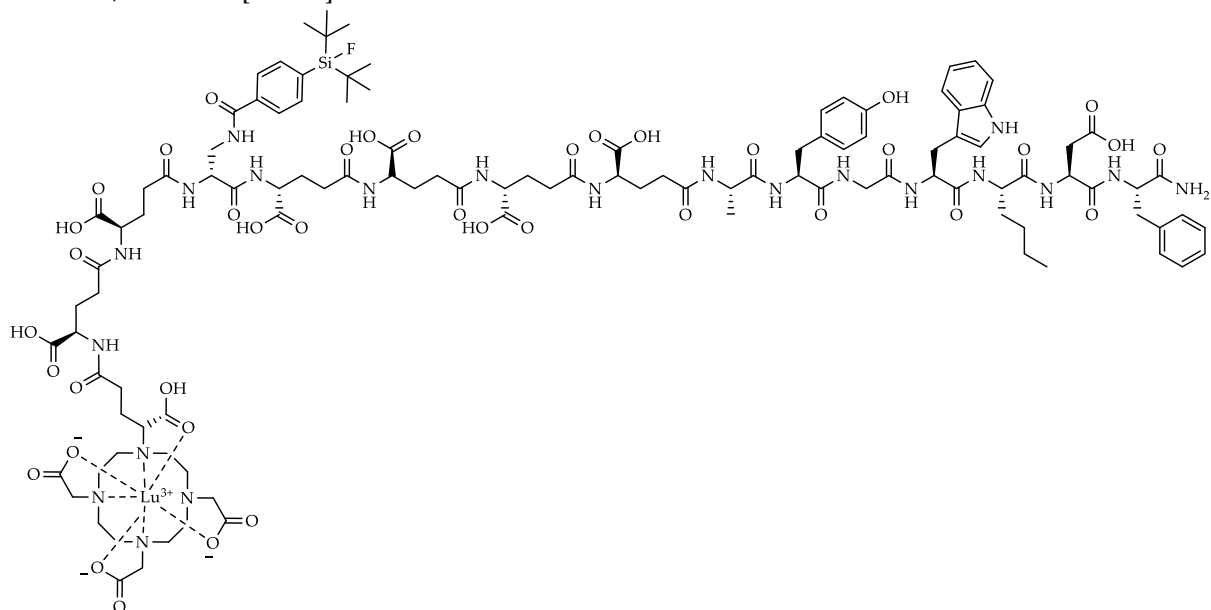

**[<sup>nat</sup>Lu]Lu-(R)-DOTAGA-rhCCK-14:** RP-HPLC (10→90% MeCN in H<sub>2</sub>O with 0.1% TFA, 15 min,  $\lambda$  = 220 nm);  $t_R$  = 9.60 min,  $K'$  = 4.69; MS (ESI, positive):  $m/z$  calculated for C<sub>111</sub>H<sub>151</sub>FLuN<sub>21</sub>O<sub>39</sub>Si: 2625.6, found:  $m/z$  = 1313.9 [M+2H]<sup>2+</sup>.



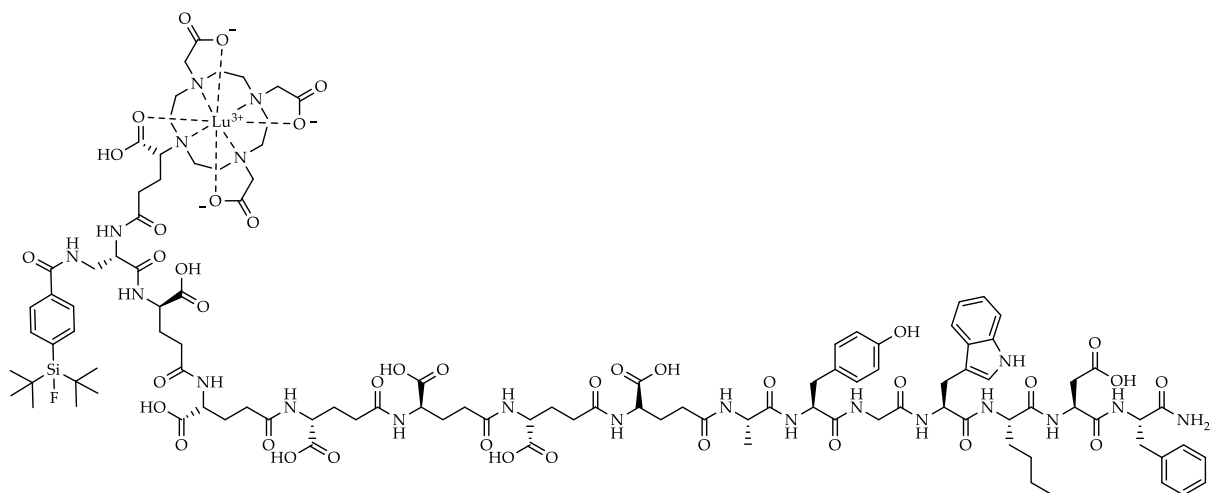

**[<sup>nat</sup>Lu]Lu-(R)-DOTAGA-rhCCK-16:** RP-HPLC (10→90% MeCN in H<sub>2</sub>O with 0.1% TFA, 15 min,  $\lambda$  = 220 nm):  $t_R$  = 9.52 min,  $K'$  = 4.64; MS (ESI, positive):  $m/z$  calculated for C<sub>111</sub>H<sub>151</sub>FLuN<sub>21</sub>O<sub>39</sub>Si: 2625.6, found:  $m/z$  = 1314.4 [M+2H]<sup>2+</sup>.

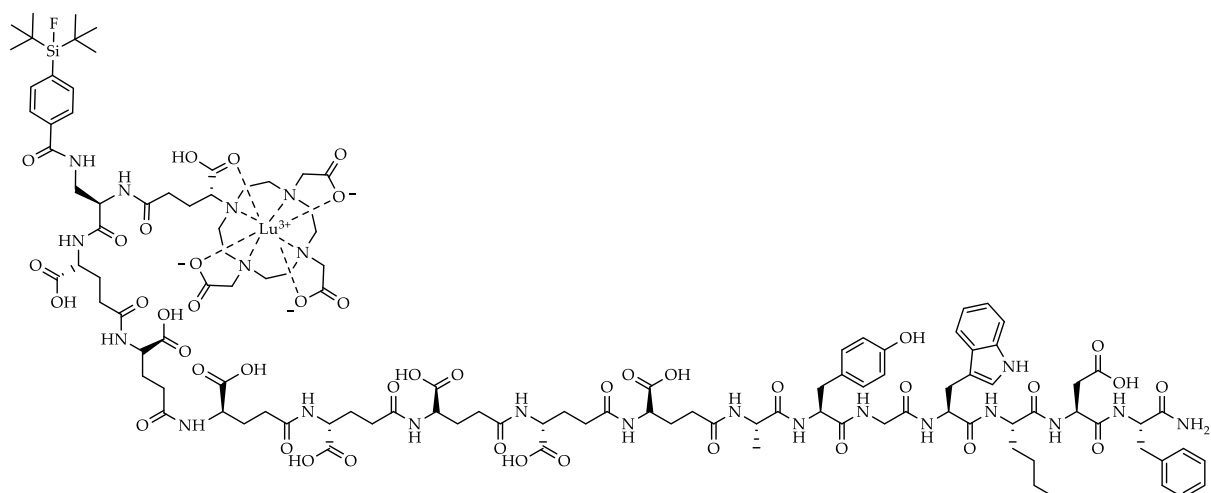

**[<sup>nat</sup>Lu]Lu-(R)-DOTAGA-rhCCK-17:** RP-HPLC (10→90% MeCN in H<sub>2</sub>O with 0.1% TFA, 15 min,  $\lambda$  = 220 nm):  $t_R$  = 9.48 min,  $K'$  = 4.62; MS (ESI, positive):  $m/z$  calculated for C<sub>116</sub>H<sub>158</sub>FLuN<sub>22</sub>O<sub>42</sub>Si: 2754.7, found:  $m/z$  = 1377.7 [M+2H]<sup>2+</sup>.

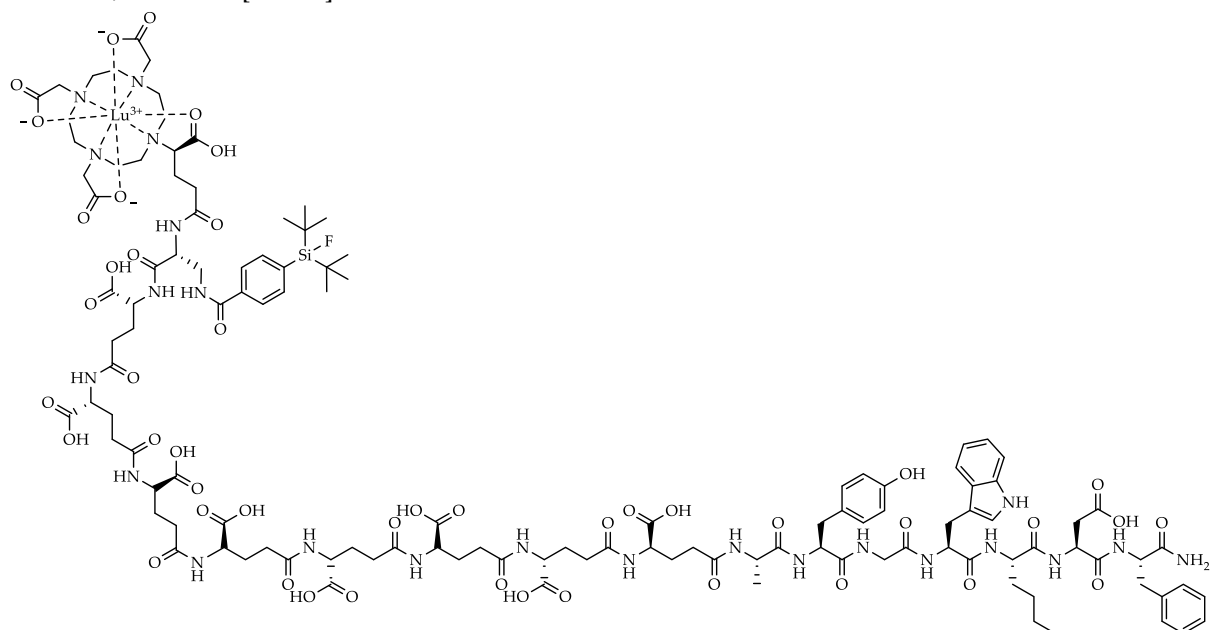

**[<sup>nat</sup>Lu]Lu-(R)-DOTAGA-rhCCK-18:** RP-HPLC (10→90% MeCN in H<sub>2</sub>O with 0.1% TFA, 15 min, λ = 220 nm): *t<sub>R</sub>* = 9.50 min, *K'* = 4.63; MS (ESI, positive): *m/z* calculated for C<sub>121</sub>H<sub>165</sub>FLuN<sub>23</sub>O<sub>45</sub>Si: 2883.8, found: *m/z* = 1443.1 [M+2H]<sup>2+</sup>.

### **<sup>177</sup>Lu-labelling**

For <sup>177</sup>Lu-labelling experiments, [<sup>177</sup>Lu]LuCl<sub>3</sub> dissolved in hydrochloric acid (0.04 M, 40 GBq/mL) was acquired from *ITM Isotope Technologies Munich SE* (Garching, Germany). Radiolabelling of the peptide precursor (1 nmol) was performed at 90 °C for 15 min in a NaOAc-buffered (1 M, pH = 5.5) hydrochloric acid (0.04 M) solution. After radiolabelling, a radiolysis quencher (sodium ascorbate, 1 M in H<sub>2</sub>O) was added and radiochemical purity was determined via radio-RP-HPLC and radio-TLC (instant thin layer chromatography paper impregnated with silica gel (iTLC-SG, *Agilent Technologies Inc.*, Folsom, United States); sodium citrate\*1.5 H<sub>2</sub>O (0.1 M)).

## ***In Vitro Experiments***

**Cell Culture.** CCK-2R expressing rat pancreatic cancer cells AR42J (CLS GmbH, Eppelheim, Germany) were cultivated in monolayers in CELLSTAR® cell culture flasks acquired from Greiner Bio-One GmbH (Frickenhausen, Germany) at 37 °C in a humidified atmosphere (5% CO<sub>2</sub>) using a HERAcell 150i-Incubator (Thermo Fisher Scientific Inc., Waltham, United States). As nutrient medium RPMI 1640 medium, supplemented with 5 mM L-Gln 5 mL non-essential amino acids (100×) and 10% FCS, was used. Furthermore, a Dulbecco's PBS solution with 0.1% EDTA (*v/v*) was applied to detach the cells for cell passaging. The detached cells were counted using a Neubauer hemocytometer (Paul Marienfeld, Lauda-Königshofen, Germany). In addition, all operations under sterile conditions were accomplished using a MSC-Advantage safety workbench (Thermo Fisher Scientific Inc., Waltham, United States).

**Determination of IC<sub>50</sub>.** AR42J cells ( $2.0 \times 10^5$  cells/well) were seeded into 24-well plates 24 ± 2 h prior to testing, using 1 mL of nutrient medium (RPMI 1640, 5 mM L-Gln, 5 mL non-essential amino acids (100×), 10% FCS). Cells were incubated at 37 °C in a humidified atmosphere (5% CO<sub>2</sub>).

After removal of the medium, each well was washed with 500 µL PBS. For the cell-based assay, 200 µL of nutrient medium (+5% BSA), [<sup>177</sup>Lu]Lu-DOTA-PP-F11N (25 µL, 0.3 pmol) as a radiolabeled reference and 25 µL of the peptide of interest in increasing concentrations ( $10^{-10}$  to  $10^{-4}$  M) in triplicate were added to the cells. Thereafter, the assay was incubated for 3 h at 37 °C and thereafter, the supernatant was collected. The cells were washed with 300 µL PBS and the collected supernatant fractions were unified. After lysis of the cells with NaOH (300 µL, 1 N) for 15 min, the respective wells were washed with NaOH (300 µL, 1 N) and both fractions were unified. The radioactivity of both, the supernatant and the lysed fractions was quantified using a γ-counter (PerkinElmer Inc., Waltham, United States). The obtained data were evaluated *via* the GraphPad PRISM software (GraphPad Software Inc., La Jolla, United States), which calculates the halfmaximal inhibitory concentration (IC<sub>50</sub>) of the peptides.

**Internalisation Studies.** For the determination of the internalisation kinetics of the various peptides, AR42J cells ( $3.0 \times 10^5$  cells/well) were seeded into polylysine coated 24-well plates adding 1 mL of nutrient medium. Afterwards, the cells were incubated for 24 ± 2 h at 37 °C in a humidified atmosphere (5% CO<sub>2</sub>).

On the day of the experiment, the medium was removed, and each well was washed with nutrient medium (300 µL). Afterwards 200 µL of nutrient medium, 25 µL of the <sup>177</sup>Lu-labeled peptide (0.3 pmol, *n* = 6) and either 25 µL of nutrient medium for internalisation studies (*n* = 3) or 25 µL of [<sup>nat</sup>Lu]Lu-DOTA-PP-F11N (10 µmol) for competition studies (*n* = 3) were added. Thereafter, the assay was incubated for various time points (1, 2, 4 and 6 h) at 37 °C in a humidified atmosphere (5% CO<sub>2</sub>). After incubation, the cells were put on ice for at least 1 min to stop internalisation kinetics and the supernatant was collected. Then, the cells were washed with an ice-cold nutrient medium (300 µL) and both fractions were unified. For the acid wash, 300 µL of an ice-cold glycine buffer (1 M, pH 1) was added. After lysis of the cells with NaOH (300 µL, 1 N) for 15 min, the respective wells were washed with NaOH (300 µL, 1 N) and both fractions were unified. The radioactivity of the supernatant, the acid wash and the lysed fractions were quantified using a γ-counter.

**Table S1.** Affinity and lipophilicity data of the compounds evaluated. Affinity data were determined on AR42J cells ( $2.0 \times 10^5$  cells/well) and [ $^{177}\text{Lu}$ ]Lu-DOTA-PP-F11N (0.3 pmol/well) as radiolabeled reference (3 h, 37 °C, RPMI 1640, 5 mM L-Gln, 5 mL non-essential amino acids (100×), 10% FCS + 5% BSA (*v/v*)).

| peptide                                             | $IC_{50}$<br>[nM] | $\log D_{7.4}$   |
|-----------------------------------------------------|-------------------|------------------|
| [ $^{nat/177}\text{Lu}$ ]Lu-DOTA-PP-F11N            | $12.8 \pm 2.8$    | $-4.75 \pm 0.07$ |
| [ $^{nat/177}\text{Lu}$ ]Lu-DOTA-PP- $\gamma$ -F11N | $7.55 \pm 0.48$   | $-4.38 \pm 0.05$ |
| [ $^{nat/177}\text{Lu}$ ]Lu-CP04                    | $11.2 \pm 0.2$    | $-3.80 \pm 0.10$ |
| [ $^{nat/177}\text{Lu}$ ]Lu- $\gamma$ -CP04         | $8.88 \pm 0.67$   | $-4.30 \pm 0.08$ |
| [ $^{nat/177}\text{Lu}$ ]Lu-(R)-DOTAGA-rhCCK-1      | $629 \pm 48$      | $-1.71 \pm 0.10$ |
| [ $^{nat/177}\text{Lu}$ ]Lu-(R)-DOTAGA-rhCCK-2      | $156 \pm 18$      | $-1.95 \pm 0.09$ |
| [ $^{nat/177}\text{Lu}$ ]Lu-(R)-DOTAGA-rhCCK-3      | $156 \pm 4$       | $-2.03 \pm 0.10$ |
| [ $^{nat/177}\text{Lu}$ ]Lu-(R)-DOTAGA-rhCCK-4      | $185 \pm 14$      | $-2.19 \pm 0.08$ |
| [ $^{nat/177}\text{Lu}$ ]Lu-(R)-DOTAGA-rhCCK-5      | $90.0 \pm 2.3$    | $-2.67 \pm 0.05$ |
| [ $^{nat/177}\text{Lu}$ ]Lu-(R)-DOTAGA-rhCCK-6      | $56.8 \pm 6.4$    | $-2.22 \pm 0.08$ |
| [ $^{nat/177}\text{Lu}$ ]Lu-(R)-DOTAGA-rhCCK-7      | $75.7 \pm 10.7$   | $-2.63 \pm 0.08$ |
| [ $^{nat/177}\text{Lu}$ ]Lu-(R)-DOTAGA-rhCCK-8      | $58.0 \pm 11.0$   | $-2.19 \pm 0.08$ |
| [ $^{nat/177}\text{Lu}$ ]Lu-(R)-DOTAGA-rhCCK-9      | $55.3 \pm 7.8$    | $-2.84 \pm 0.04$ |
| [ $^{nat/177}\text{Lu}$ ]Lu-(R)-DOTAGA-rhCCK-10     | $863 \pm 148$     | $-2.15 \pm 0.08$ |
| [ $^{nat/177}\text{Lu}$ ]Lu-(R)-DOTAGA-rhCCK-11     | $111 \pm 13$      | $-2.23 \pm 0.07$ |
| [ $^{nat/177}\text{Lu}$ ]Lu-(R)-DOTAGA-rhCCK-12     | $89.7 \pm 14.5$   | $-2.34 \pm 0.05$ |
| [ $^{nat/177}\text{Lu}$ ]Lu-(R)-DOTAGA-rhCCK-13     | $68.5 \pm 11.4$   | $-2.57 \pm 0.06$ |
| [ $^{nat/177}\text{Lu}$ ]Lu-(R)-DOTAGA-rhCCK-14     | $51.3 \pm 9.3$    | $-2.26 \pm 0.05$ |
| [ $^{nat/177}\text{Lu}$ ]Lu-(R)-DOTAGA-rhCCK-15     | $33.0 \pm 11.1$   | $-2.50 \pm 0.02$ |
| [ $^{nat/177}\text{Lu}$ ]Lu-(R)-DOTAGA-rhCCK-16     | $20.4 \pm 2.7$    | $-2.54 \pm 0.05$ |
| [ $^{nat/177}\text{Lu}$ ]Lu-(R)-DOTAGA-rhCCK-17     | $29.5 \pm 1.9$    | $-2.10 \pm 0.06$ |
| [ $^{nat/177}\text{Lu}$ ]Lu-(R)-DOTAGA-rhCCK-18     | $20.4 \pm 2.0$    | $-2.16 \pm 0.09$ |

**Table S2.** Receptor-mediated internalisation values (37 °C, RPMI 1640, 5 mM L-Gln, 5 mL non-essential amino acids (100×), 10% FCS, 0.25 pmol/well) determined as percent (%) of the applied activity of [ $^{177}\text{Lu}$ ]Lu-(R)-DOTAGA-rhCCK-9 and -16 as well as the references [ $^{177}\text{Lu}$ ]Lu-DOTA-PP-F11N and [ $^{177}\text{Lu}$ ]Lu-CP04 using AR42J cells ( $3.0 \times 10^5$  cells/well) at different time points (1, 2, 4 and 6 h). Data are corrected for non-specific binding (10  $\mu\text{mol}$ /well, [ $^{nat}\text{Lu}$ ]Lu-DOTA-PP-F11N).

| Peptide                                     | Internalisation Values<br>(%) |                 |                 |                | Internalisation<br>Values*<br>(% of reference) |
|---------------------------------------------|-------------------------------|-----------------|-----------------|----------------|------------------------------------------------|
|                                             | 1 h                           | 2 h             | 4 h             | 6 h            | 6 h                                            |
| [ $^{177}\text{Lu}$ ]Lu-DOTA-PP-F11N        | $6.44 \pm 0.32$               | $10.1 \pm 0.4$  | $17.5 \pm 1.0$  | $22.4 \pm 0.6$ | -                                              |
| [ $^{177}\text{Lu}$ ]Lu-CP04                | $5.16 \pm 0.44$               | $9.33 \pm 0.36$ | $15.4 \pm 0.7$  | $20.5 \pm 0.5$ | $91.6 \pm 2.4$                                 |
| [ $^{177}\text{Lu}$ ]Lu-(R)-DOTAGA-rhCCK-9  | $2.08 \pm 0.12$               | $3.44 \pm 0.55$ | $8.01 \pm 0.53$ | $13.2 \pm 0.5$ | $65.7 \pm 2.5$                                 |
| [ $^{177}\text{Lu}$ ]Lu-(R)-DOTAGA-rhCCK-16 | $7.63 \pm 0.13$               | $14.0 \pm 1.3$  | $23.2 \pm 2.7$  | $32.2 \pm 2.1$ | $135 \pm 9$                                    |

\* Internalisation values are depicted as % of the reference [ $^{177}\text{Lu}$ ]Lu-DOTA-PP-F11N

**Table S3.** Total cell uptake (37 °C, RPMI 1640, 5 mM L-Gln, 5 mL non-essential amino acids (100×), 10% FCS, 0.25 pmol/well) determined as percent (%) of the applied activity of [<sup>177</sup>Lu]Lu-(R)-DOTAGA-rhCCK-9 and -16 as well as the references [<sup>177</sup>Lu]Lu-DOTA-PP-F11N and [<sup>177</sup>Lu]Lu-CP04 using AR42J cells (3.0 × 10<sup>5</sup> cells/well) at different time points (1, 2, 4 and 6 h). Data are corrected for non-specific binding (10 μmol/well, [<sup>nat</sup>Lu]Lu-DOTA-PP-F11N).

| Peptide                                    | Total cell uptake (%) |             |             |            |
|--------------------------------------------|-----------------------|-------------|-------------|------------|
|                                            | 1 h                   | 2 h         | 4 h         | 6 h        |
| [ <sup>177</sup> Lu]Lu-DOTA-PP-F11N        | 7.03 ± 1.45           | 10.6 ± 1.5  | 18.5 ± 2.5  | 23.5 ± 1.4 |
| [ <sup>177</sup> Lu]Lu-CP04                | 6.00 ± 0.42           | 10.0 ± 0.4  | 16.5 ± 0.9  | 20.4 ± 1.7 |
| [ <sup>177</sup> Lu]Lu-(R)-DOTAGA-rhCCK-9  | 2.25 ± 0.23           | 3.46 ± 0.56 | 8.31 ± 0.59 | 13.4 ± 0.7 |
| [ <sup>177</sup> Lu]Lu-(R)-DOTAGA-rhCCK-16 | 8.37 ± 0.07           | 14.4 ± 1.3  | 23.6 ± 2.8  | 32.8 ± 2.3 |

**Table S4.** Biodistribution data of [<sup>177</sup>Lu]Lu-DOTA-PP-F11N, [<sup>177</sup>Lu]Lu-(R)-DOTAGA-rhCCK-9 and [<sup>177</sup>Lu]Lu-(R)-DOTAGA-rhCCK-16 in selected organs at 24 h p.i. in AR42J tumour-bearing CB17-SCID mice (100 pmol each). Data are expressed as %ID/g, mean ± SD.

| Organ     | [ <sup>177</sup> Lu]Lu-DOTA-PP-F11N<br>(n = 4) | [ <sup>177</sup> Lu]Lu-(R)-DOTAGA-rhCCK-9<br>(n = 4) | [ <sup>177</sup> Lu]Lu-(R)-DOTAGA-rhCCK-16<br>(n = 4) | [ <sup>177</sup> Lu]Lu-(R)-DOTAGA-rhCCK-16<br>competition studies<br>(n = 2) |
|-----------|------------------------------------------------|------------------------------------------------------|-------------------------------------------------------|------------------------------------------------------------------------------|
| Blood     | 0.00 ± 0.00                                    | 0.02 ± 0.00                                          | 0.01 ± 0.00                                           | 0.05 ± 0.00                                                                  |
| Heart     | 0.02 ± 0.01                                    | 0.09 ± 0.03                                          | 0.11 ± 0.01                                           | 0.13 ± 0.01                                                                  |
| Lung      | 0.03 ± 0.02                                    | 0.10 ± 0.05                                          | 0.09 ± 0.02                                           | 2.59 ± 1.27                                                                  |
| Liver     | 0.67 ± 0.64                                    | 1.07 ± 0.54                                          | 1.18 ± 0.27                                           | 2.31 ± 0.66                                                                  |
| Spleen    | 0.07 ± 0.03                                    | 0.70 ± 0.69                                          | 0.62 ± 0.03                                           | 1.73 ± 0.01                                                                  |
| Pancreas  | 0.05 ± 0.01                                    | 0.31 ± 0.20                                          | 0.39 ± 0.12                                           | 0.20 ± 0.01                                                                  |
| Stomach   | 0.36 ± 0.05                                    | 1.80 ± 0.37                                          | 3.51 ± 0.50                                           | 0.15 ± 0.04                                                                  |
| Intestine | 0.04 ± 0.02                                    | 0.26 ± 0.04                                          | 0.20 ± 0.04                                           | 0.16 ± 0.03                                                                  |
| Kidney    | 3.08 ± 0.51                                    | 84.4 ± 22.7                                          | 85.5 ± 11.3                                           | 105 ± 21                                                                     |
| Adrenal   | 0.03 ± 0.03                                    | 0.45 ± 0.30                                          | 1.49 ± 1.50                                           | 0.40 ± 0.11                                                                  |
| Muscle    | 0.00 ± 0.00                                    | 0.03 ± 0.01                                          | 0.05 ± 0.01                                           | 0.06 ± 0.04                                                                  |
| Bone      | 0.03 ± 0.01                                    | 0.82 ± 0.42                                          | 0.17 ± 0.02                                           | 0.24 ± 0.04                                                                  |
| Tumour    | 1.88 ± 0.82                                    | 6.40 ± 1.48                                          | 15.70 ± 3.27                                          | 0.91 ± 0.04                                                                  |

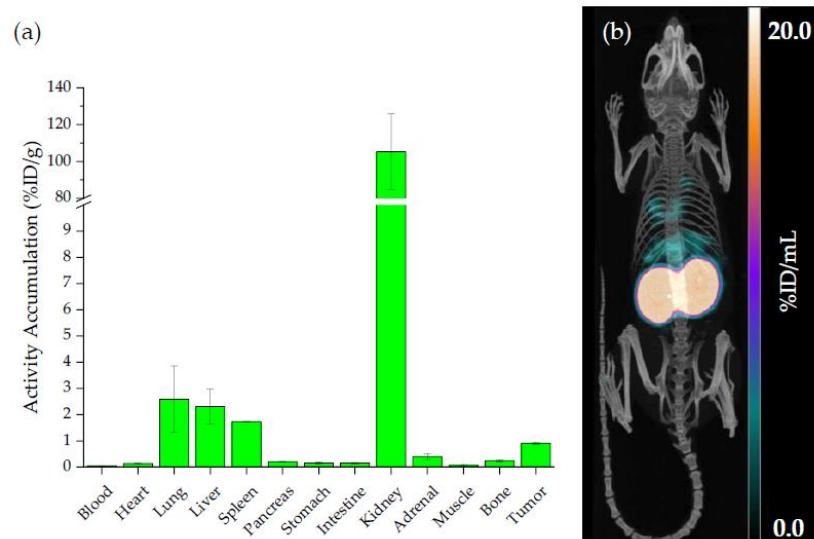

**Figure S4.** (a) Biodistribution of [ $^{177}\text{Lu}$ ]Lu-DOTA-rhCCK-16 (100 pmol) co-injected with [ $^{\text{nat}}\text{Lu}$ ]Lu-DOTA-MGS5 (40 nmol) in selected organs (%ID/g) at 24 h p.i. in AR42J tumour-bearing CB17-SCID mice. Data is expressed as mean  $\pm$  SD ( $n = 2$ ). (b) Representative  $\mu\text{SPECT/CT}$  images of [ $^{177}\text{Lu}$ ]Lu-DOTA-rhCCK-16 co-injected with [ $^{\text{nat}}\text{Lu}$ ]Lu-DOTA-MGS5 (40 nmol) at 24 h p.i. in AR42J tumour-bearing CB17-SCID mice.
